# Supplementary material for: Ti3C2 supported transition metal oxides and silver as catalysts toward efficient electricity generation in microbial fuel cells
Source: Royal Society of Chemistry journal article supplement (doi:10.1039/d1cy00464f), 2021-01-01
Supplement: d1cy00464f1.pdf [file d1cy00464f1.pdf]

## Supplementary Information

### **Ti<sub>3</sub>C<sub>2</sub> supported transition metal oxides and silver as catalysts toward efficient electricity generation in microbial fuel cell**

Xinghong Wang <sup>a</sup>, Xiaobo Gong <sup>\*a, b</sup>, Liu Chen <sup>a</sup>, Siyu Li <sup>a</sup>, Jinlin Xie <sup>a</sup>, Yong Liu <sup>a, b</sup>

<sup>a</sup> College of Chemistry and Materials Science, Sichuan Normal University, Chengdu, Sichuan 610066, China.

<sup>b</sup> Key Laboratory of Special Waste Water Treatment, Sichuan Province Higher Education System, Chengdu, Sichuan 610066, China.

\*Corresponding author. E-mail: gxb@sicnu.edu.cn.

## Experimental section

### Preparation of Ag-Ti<sub>3</sub>C<sub>2</sub>

Ti<sub>3</sub>C<sub>2</sub> was synthesized by selectively etching Ti<sub>3</sub>AlC<sub>2</sub> using HF. Briefly, 2.0 g commercial Ti<sub>3</sub>AlC<sub>2</sub> was added to 50 mL of HF, and stirred at 30 °C for 24 h. After that, the resulting mixture was further washed to neutral by centrifugation with deionized water. Then, the exfoliated Ti<sub>3</sub>C<sub>2</sub> clay was collected and dried under vacuum at 60 °C for 24 h. Till now, the multi-layer stacked Ti<sub>3</sub>C<sub>2</sub> has been prepared.

Ag-Ti<sub>3</sub>C<sub>2</sub> was obtained by a facile silver ions reduction method, in which Ti<sub>3</sub>C<sub>2</sub> was employed as both support and reductant. In detail, 0.1 g Ti<sub>3</sub>C<sub>2</sub> was immersed in 100 mL of deionized water and then sonicated for 30 min to separate the stacked layers. 0.1 g AgNO<sub>3</sub> was dissolved in 20 mL of deionized water and slowly dropped into the homogeneous Ti<sub>3</sub>C<sub>2</sub> suspension. Afterwards, the mixture was kept stirring at 30 °C for 20 min, and then centrifuged and dried under vacuum at 60 °C for 24 h.

### Preparation of Ti<sub>3</sub>C<sub>2</sub>-M<sub>x</sub>O<sub>y</sub>

Ti<sub>3</sub>C<sub>2</sub>-Co<sub>3</sub>O<sub>4</sub>. 0.2 g Ti<sub>3</sub>C<sub>2</sub> was added to 20 mL of deionized water dissolved 0.623 g Co(CH<sub>3</sub>COO)<sub>2</sub>·4H<sub>2</sub>O and 3.96 g C<sub>6</sub>H<sub>12</sub>O<sub>6</sub>·H<sub>2</sub>O, followed by ultrasound to uniformly disperse. Then, 0.5 g NaHCO<sub>3</sub> was dissolved in 25 mL of deionized water and slowly dropped into the former. After reaction with gentle magnetic stirring at 25 °C for 12 h, the precipitate was washed to neutral with deionized water and dried in a vacuum at 80 °C for 12 h. The precursor was further heated to 250 °C in air and maintained for 2 h. Subsequently, the production was washed with deionized water and dried in a vacuum at 80 °C for 12 h.

Ti<sub>3</sub>C<sub>2</sub>-Fe<sub>3</sub>O<sub>4</sub>. 2.0 g FeCl<sub>2</sub>·4H<sub>2</sub>O and 5.2 g FeCl<sub>3</sub>·6H<sub>2</sub>O were dissolved in 25 mL of deionized water saturated with gaseous N<sub>2</sub>, followed by mixing into 1.7 mL 6.0 mol L<sup>-1</sup> HCl. Then, the mixture was poured to N<sub>2</sub>-saturated 250 mL 1.5 mol L<sup>-1</sup> NaOH with 0.2 g dispersive Ti<sub>3</sub>C<sub>2</sub>. After reaction with gentle magnetic stirring at 80 °C for 1 h, the precipitate was washed to neutral with deionized water and dried in a vacuum at 80 °C for 12 h.

Ti<sub>3</sub>C<sub>2</sub>-MnO<sub>2</sub>. 2.535 g MnSO<sub>4</sub>·H<sub>2</sub>O was dissolved in 100 mL of deionized water, and then 0.2 g Ti<sub>3</sub>C<sub>2</sub> was added and dispersed by ultrasound. Then, 1.58 g KMnO<sub>4</sub> dissolved in 100 mL of deionized water was poured to the former. After reaction with gentle magnetic stirring at 25 °C for 6 h, the precipitate was centrifugally washed with deionized water and dried in air at 100 °C for 2 h.

Ti<sub>3</sub>C<sub>2</sub>-NiO. 0.2 g Ti<sub>3</sub>C<sub>2</sub> was added to 50 mL 0.15 mol L<sup>-1</sup> Ni(NO<sub>3</sub>)<sub>2</sub>, followed by ultrasound to uniformly disperse. Then, 50 mL 0.4 mol L<sup>-1</sup> Na<sub>2</sub>O<sub>2</sub> was poured to the former. After reaction at 25 °C for 12 h, the precipitate was centrifugally washed to neutral with deionized water and dried in air at 100 °C for 6 h. The precursor further was calcined in air at 350 °C for 2 h. Subsequently, the production was washed with deionized water and dried in a vacuum at 80 °C for 12 h.

The as-prepared Ti<sub>3</sub>C<sub>2</sub>-Co<sub>3</sub>O<sub>4</sub>, Ti<sub>3</sub>C<sub>2</sub>-Fe<sub>3</sub>O<sub>4</sub>, Ti<sub>3</sub>C<sub>2</sub>-MnO<sub>2</sub>, Ti<sub>3</sub>C<sub>2</sub>-NiO were dubbed as Ti<sub>3</sub>C<sub>2</sub>-M<sub>x</sub>O<sub>y</sub> (M=Co, Fe, Mn, Ni).

### Preparation of Ti<sub>3</sub>C<sub>2</sub>-M<sub>x</sub>O<sub>y</sub>-Ag

Ti<sub>3</sub>C<sub>2</sub>-M<sub>x</sub>O<sub>y</sub>-Ag catalysts were fabricated by a two-step method. Firstly, the different Ti<sub>3</sub>C<sub>2</sub>-M<sub>x</sub>O<sub>y</sub> were prepared by chemical precipitation. Secondly, 0.1 g Ti<sub>3</sub>C<sub>2</sub>-M<sub>x</sub>O<sub>y</sub> and 0.1 g AgNO<sub>3</sub> were added to 100 mL of deionized water, sonicated for 5 min and transferred to a 250 mL beaker. 0.1 g KBH<sub>4</sub> dissolved in 20 mL of deionized water was slowly dropped into the former solution. After that, the mixture was kept stirring at 30 °C for 5 min, and then centrifuged and dried in a vacuum at 80 °C for 12 h.

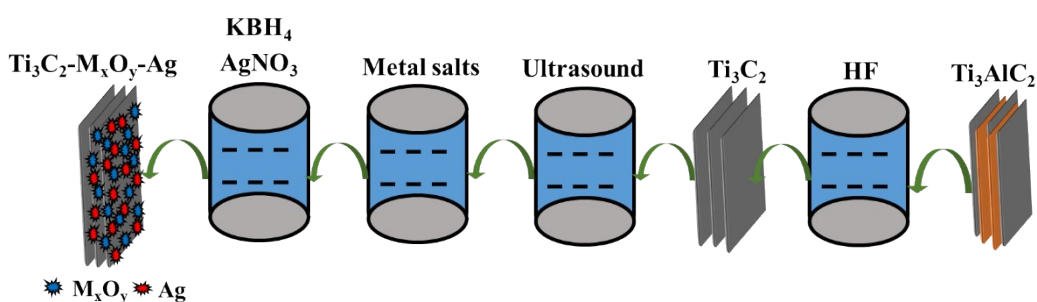

Scheme S1 The diagram of  $\text{Ti}_3\text{C}_2\text{-M}_x\text{O}_y\text{-Ag}$  for preparation.

### Material characterizations

Field emission scanning electron microscopy (FESEM, Hitachi S-4800, Japan) was used to observe morphology of the as-prepared catalysts. Then, nitrogen adsorption-desorption measurement was conducted on Micromeritics instruments (ASAP 2460, US), where the specific surface area and pore size distribution were further calculated by Brunauer-Emmet-Teller and Barrett-Joiner-Halenda formulas. The X-ray diffraction (XRD, MiniFlex600, Japan) and Fourier transform infrared spectroscopy (FT-IR, VERTEX 70, Germany) were carried out to investigate the crystal structure and functional groups. Furthermore, the X-ray photoelectron spectroscopy (XPS, PH1-5700, US) was performed to analyze the surface chemical composition and elemental valence state.

### Electrochemical tests

The electrochemical measurements were conducted on an electrochemical workstation (CHI700D, Chenhua Co. Ltd., China) equipped with the RRDE-3A apparatus (RRDE-3A, ALS, Japan) at room temperature. A glassy carbon electrode (4mm in diameter) with platinum outer ring was used as working electrode. Typically, the platinum wire and saturated calomel electrode (SCE) were employed as counter and reference electrodes to form current and voltage circuits, respectively. The 20 mg of  $\text{Ti}_3\text{C}_2\text{-M}_x\text{O}_y\text{-Ag}$  was uniformly dispersed in 2 mL of absolute ethanol and 8 mL of deionized water by ultrasound. Then, 10  $\mu\text{L}$  suspension was deposited onto polished glassy carbon disk, followed by drying and immobilizing by 5  $\mu\text{L}$  commercial Nafion (5 wt%) binder. All the tests were performed in 50  $\text{mmol L}^{-1}$  phosphate buffer solution (PBS,  $\text{pH}=7.2$ ).

### MFC construction and operation

In this work, the single chamber air-cathode MFC with an inner volume of 28 mL was assembled using Plexiglas tube, where the anode and cathode at a distance of 4 cm were connected with titanium wires across a fixed external resistor (1000  $\Omega$ ). The carbon felt pretreated by acetone for 8 h was used as an anode to colonize active bacteria, and a gas diffusion cathode (projected area of 7.0  $\text{cm}^2$ ) was fabricated by stainless steel mesh substrate, air-diffusion layer consisted of carbon powder (Vulcan XC72) and PTFE (60 wt%) and catalytic layer prepared by a certain proportion of catalysts, deionized water, Nafion and isopropanol. Electrochemically active bacteria were provided with activated sludge obtained from secondary sedimentation tank of local wastewater treatment plant. The MFC was inoculated with a mixture containing 100  $\text{mmol L}^{-1}$  PBS, 1  $\text{g L}^{-1}$  glucose and active microorganisms in vaccination phase. When voltage output was stable for 2~3 cycles, it indicated that the MFC has been started successfully. After initiation, the nutritive medium with 50  $\text{mmol L}^{-1}$  PBS and 1  $\text{g L}^{-1}$  glucose was supplied for MFC. The voltage was recorded by a data acquisition (PISO-813S, ICP DAS Co., Ltd, Taiwan). Subsequently, polarization measurements were performed to estimate the power output for MFC.

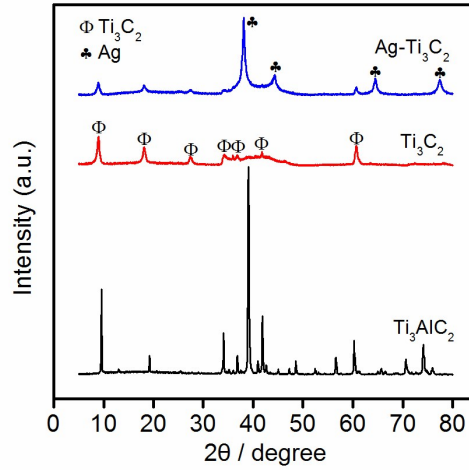

Fig. S1 XRD patterns of commercial  $\text{Ti}_3\text{AlC}_2$ ,  $\text{Ti}_3\text{C}_2$  and  $\text{Ag-Ti}_3\text{C}_2$ .

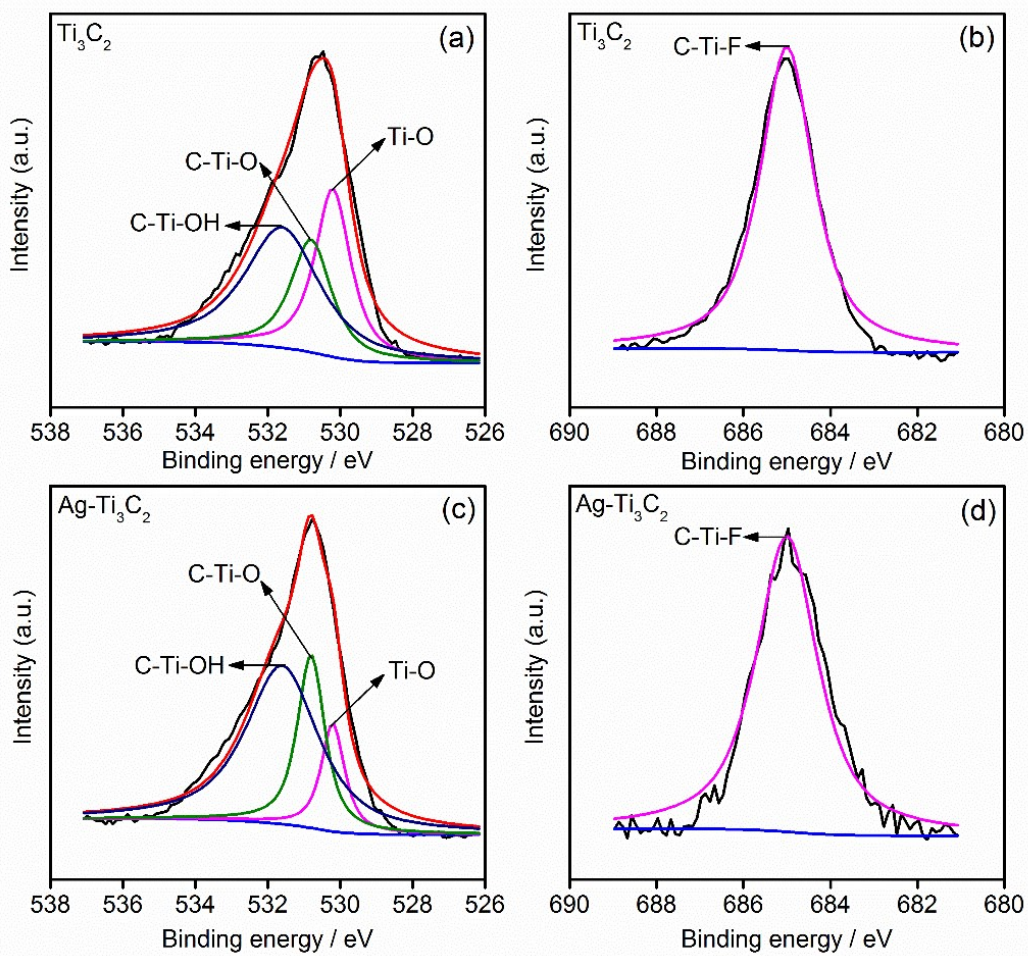

Fig. S2 High-resolution spectra in  $\text{O}_{1s}$  and  $\text{F}_{1s}$  regions of (a, b)  $\text{Ti}_3\text{C}_2$  and (c, d)  $\text{Ag-Ti}_3\text{C}_2$ .

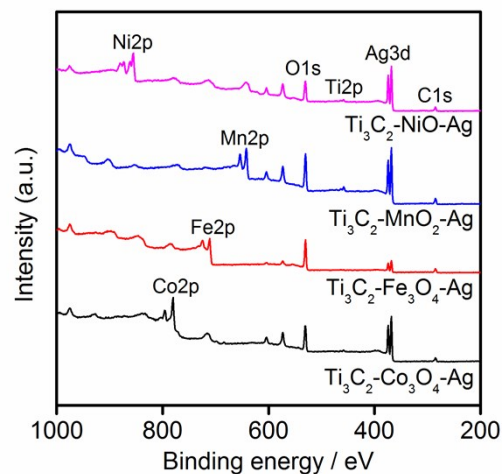

Fig. S3 XPS survey spectra of  $\text{Ti}_3\text{C}_2\text{-M}_x\text{O}_y\text{-Ag}$ .

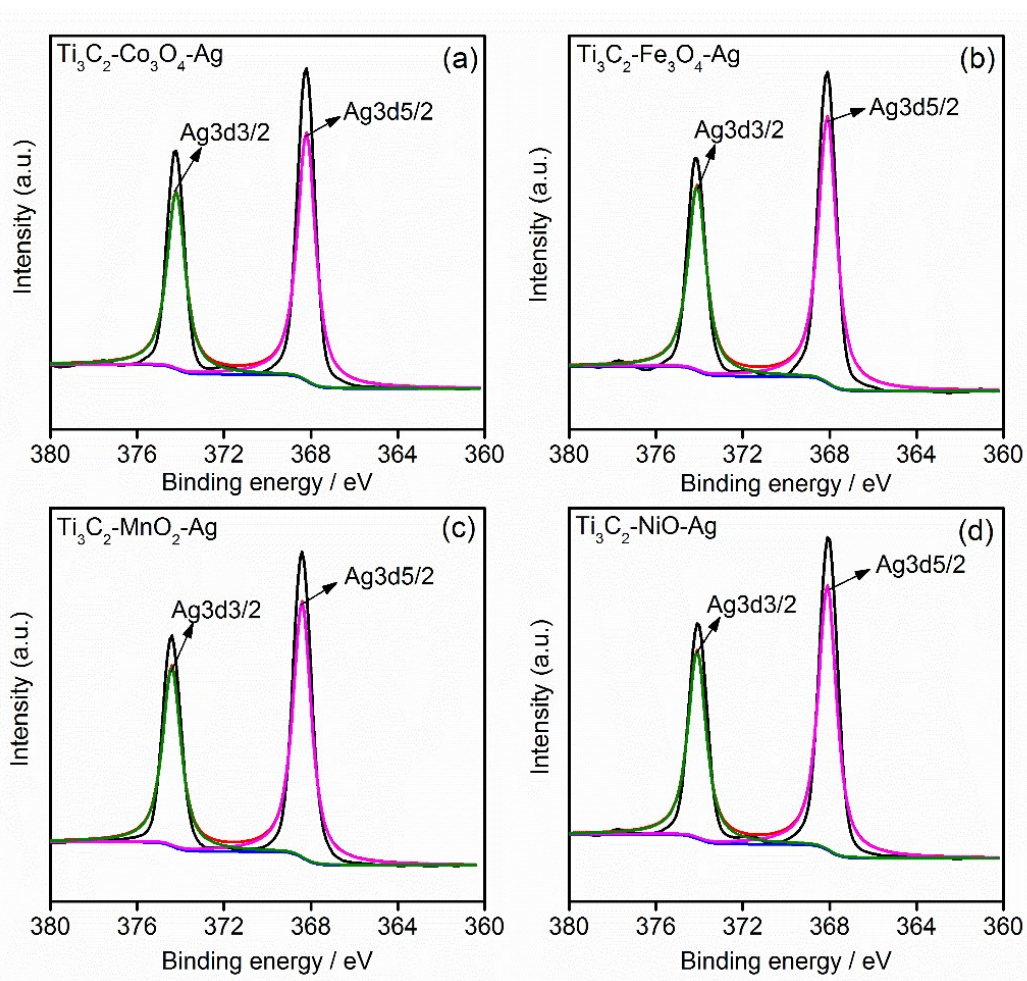

Fig. S4 High-resolution spectrum in  $\text{Ag}_{3d}$  region of (a)  $\text{Ti}_3\text{C}_2\text{-Co}_3\text{O}_4\text{-Ag}$ , (b)  $\text{Ti}_3\text{C}_2\text{-Fe}_3\text{O}_4\text{-Ag}$ , (c)  $\text{Ti}_3\text{C}_2\text{-MnO}_2\text{-Ag}$  and (d)  $\text{Ti}_3\text{C}_2\text{-NiO-Ag}$ .

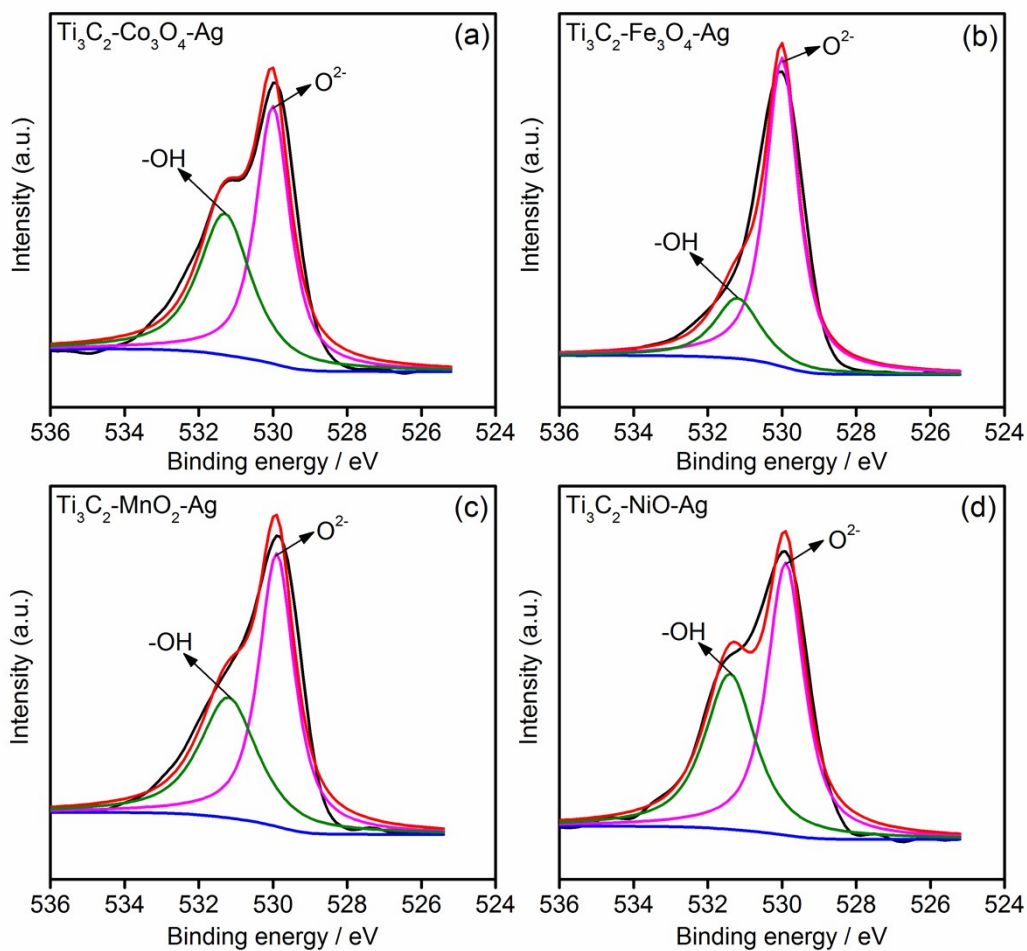

Fig. S5 High-resolution spectrum in  $O_{1s}$  region of (a)  $Ti_3C_2-Co_3O_4-Ag$ , (b)  $Ti_3C_2-Fe_3O_4-Ag$ , (c)  $Ti_3C_2-MnO_2-Ag$  and (d)  $Ti_3C_2-NiO-Ag$ .

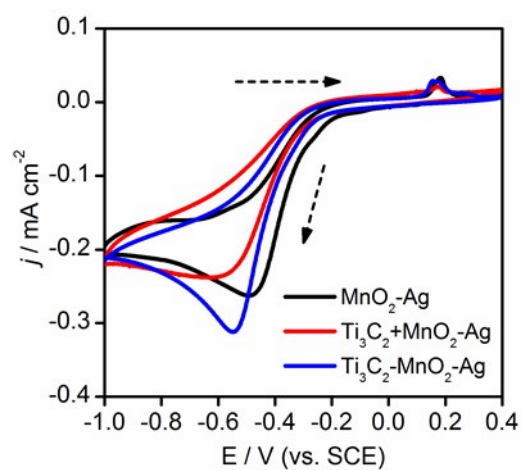

Fig. S6 Cyclic voltammograms of  $MnO_2-Ag$ ,  $Ti_3C_2+MnO_2-Ag$  and  $Ti_3C_2-MnO_2-Ag$ .

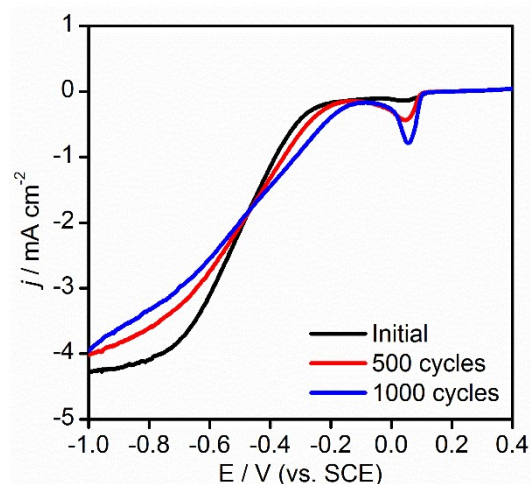

Fig. S7 Linear sweep voltammetry curves of  $\text{Ti}_3\text{C}_2\text{-MnO}_2\text{-Ag}$  at 1600 rpm in  $\text{O}_2$ -saturated  $50 \text{ mmol L}^{-1}$  PBS.

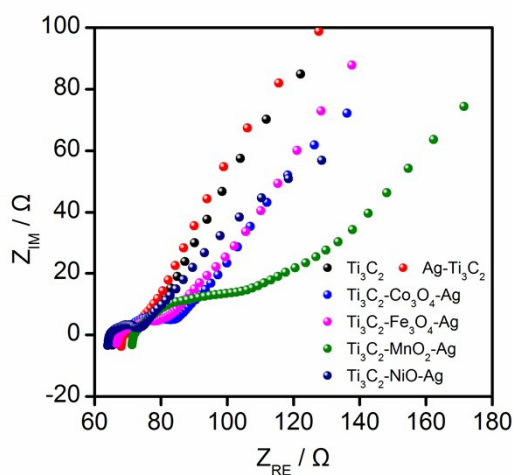

Fig. S8 Nyquist plots based electrochemical impedance spectroscopy of air-cathode with  $\text{Ti}_3\text{C}_2$ ,  $\text{Ag-Ti}_3\text{C}_2$  and  $\text{Ti}_3\text{C}_2\text{-M}_x\text{O}_y\text{-Ag}$  in MFC.

Table S1 Atomic content of elements in  $\text{Ti}_3\text{C}_2$  and  $\text{Ag-Ti}_3\text{C}_2$ .

| Sample                     | Ag <sub>(at%)</sub> | Ti <sub>(at%)</sub> | C <sub>(at%)</sub> | O <sub>(at%)</sub> | F <sub>(at%)</sub> |
|----------------------------|---------------------|---------------------|--------------------|--------------------|--------------------|
| $\text{Ti}_3\text{C}_2$    | ---                 | 17.47               | 52.37              | 21.24              | 8.92               |
| $\text{Ag-Ti}_3\text{C}_2$ | 11.22               | 9.83                | 41.99              | 31.61              | 5.35               |

Table S2 Atomic content of elements in  $\text{Ti}_3\text{C}_2\text{-M}_x\text{O}_y\text{-Ag}$ .

| Sample                                                  | Co <sub>(at%)</sub> | Fe <sub>(at%)</sub> | Mn <sub>(at%)</sub> | Ni <sub>(at%)</sub> | Ag <sub>(at%)</sub> | Ti <sub>(at%)</sub> | C <sub>(at%)</sub> | O <sub>(at%)</sub> | F <sub>(at%)</sub> |
|---------------------------------------------------------|---------------------|---------------------|---------------------|---------------------|---------------------|---------------------|--------------------|--------------------|--------------------|
| $\text{Ti}_3\text{C}_2\text{-Co}_3\text{O}_4\text{-Ag}$ | 19.6                | ---                 | ---                 | ---                 | 11.67               | 2.98                | 18.05              | 44.02              | 3.68               |
| $\text{Ti}_3\text{C}_2\text{-Fe}_3\text{O}_4\text{-Ag}$ | ---                 | 27.46               | ---                 | ---                 | 3.08                | 1.64                | 17.95              | 47.77              | 2.09               |
| $\text{Ti}_3\text{C}_2\text{-MnO}_2\text{-Ag}$          | ---                 | ---                 | 16.26               | ---                 | 10.64               | 4.57                | 20.21              | 45.30              | 3.03               |
| $\text{Ti}_3\text{C}_2\text{-NiO-Ag}$                   | ---                 | ---                 | ---                 | 24.08               | 11.44               | 3.78                | 19.52              | 37.90              | 3.28               |
